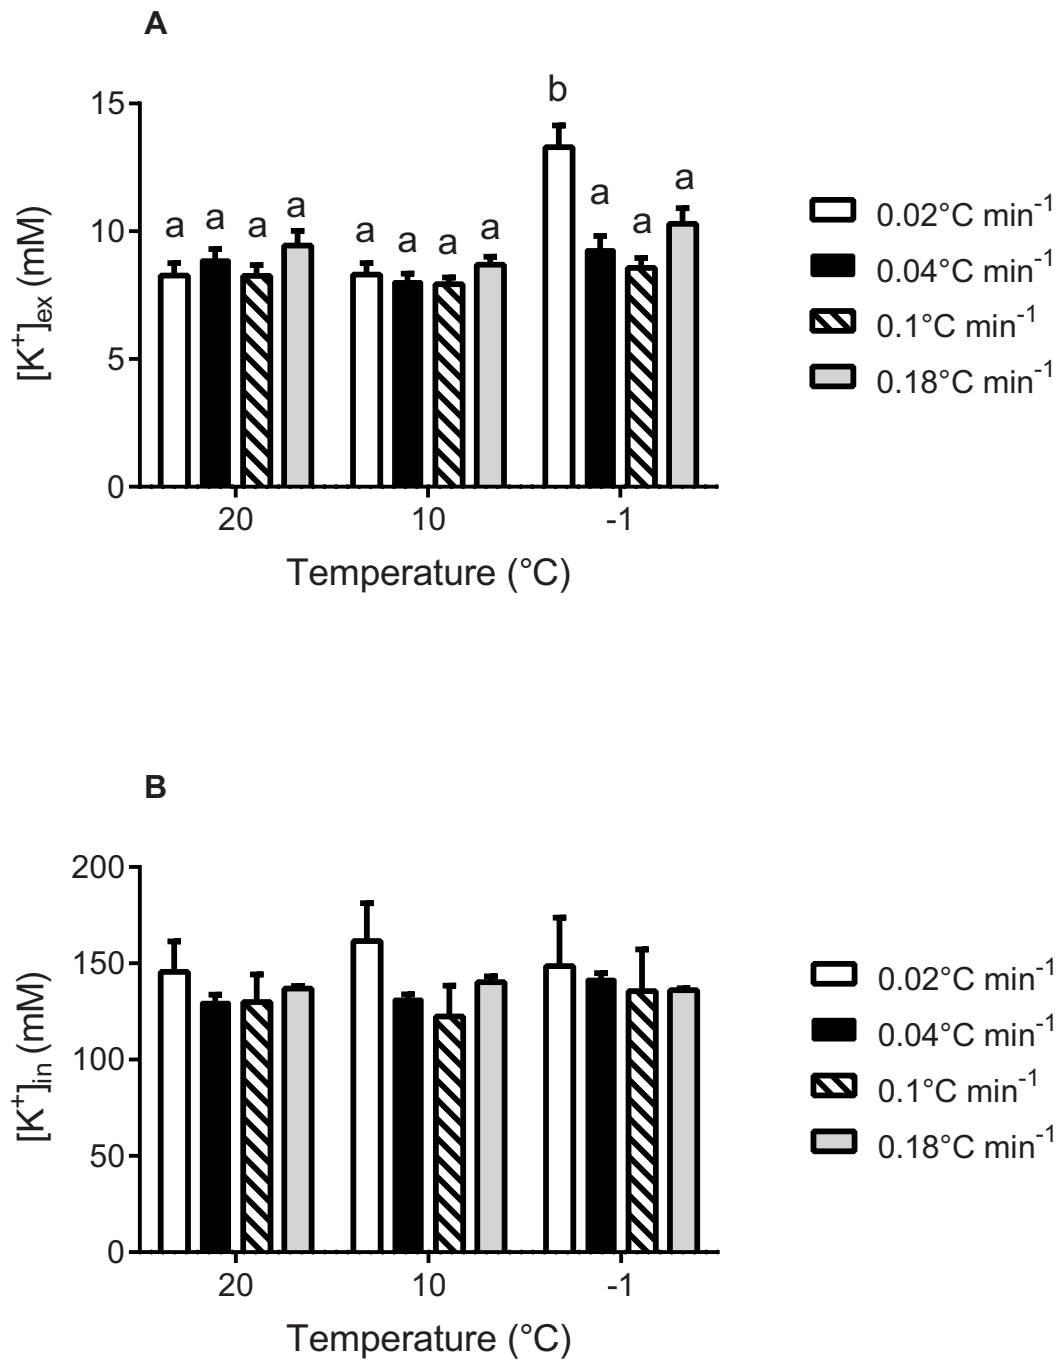

**Fig. S1. Extra- and intracellular concentrations of  $K^+$  at different temperatures and cooling rates.** (A) Extracellular  $[K^+]$  measured at three temperatures during different cooling rates. Bars represent means  $\pm$  s.e.m. of 8-10 samples in each treatment. A significant interaction was found between cooling rate and temperature using a Two-way ANOVA. The means flanked by different letters within a temperature group are statistically different at  $P < 0.05$ . (B) Intracellular  $[K^+]$  measured at three temperatures during different cooling rates. Bars represent means  $\pm$  s.e.m. of 8-10 samples in each treatment.

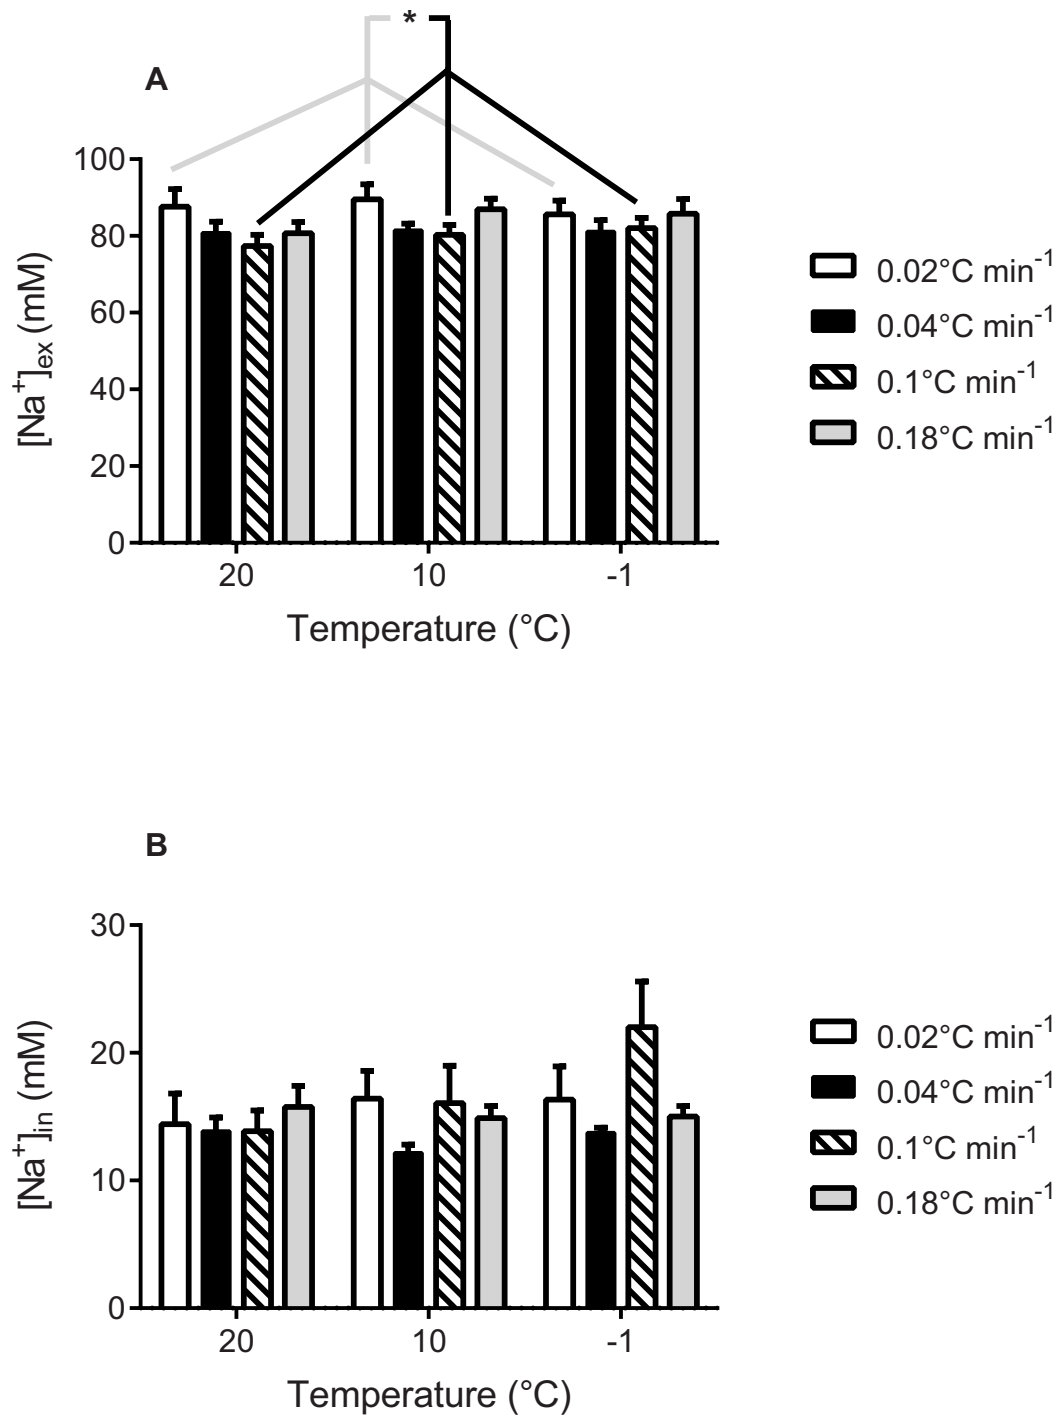

**Fig. S2. Extra- and intracellular concentrations of Na<sup>+</sup> at different temperatures and cooling rates.** (A) Extracellular [Na<sup>+</sup>] measured at three temperatures during different cooling rates. Bars represent means  $\pm$  s.e.m. of 8-10 samples in each treatment. A significant effect of cooling rate was found using a Two-Way ANOVA. Statistical differences ( $P < 0.05$ ) between cooling rates are indicated by \*. (B) Intracellular [Na<sup>+</sup>] measured at three temperatures during different cooling rates. Bars represent means  $\pm$  s.e.m. of 8-10 samples in each treatment.

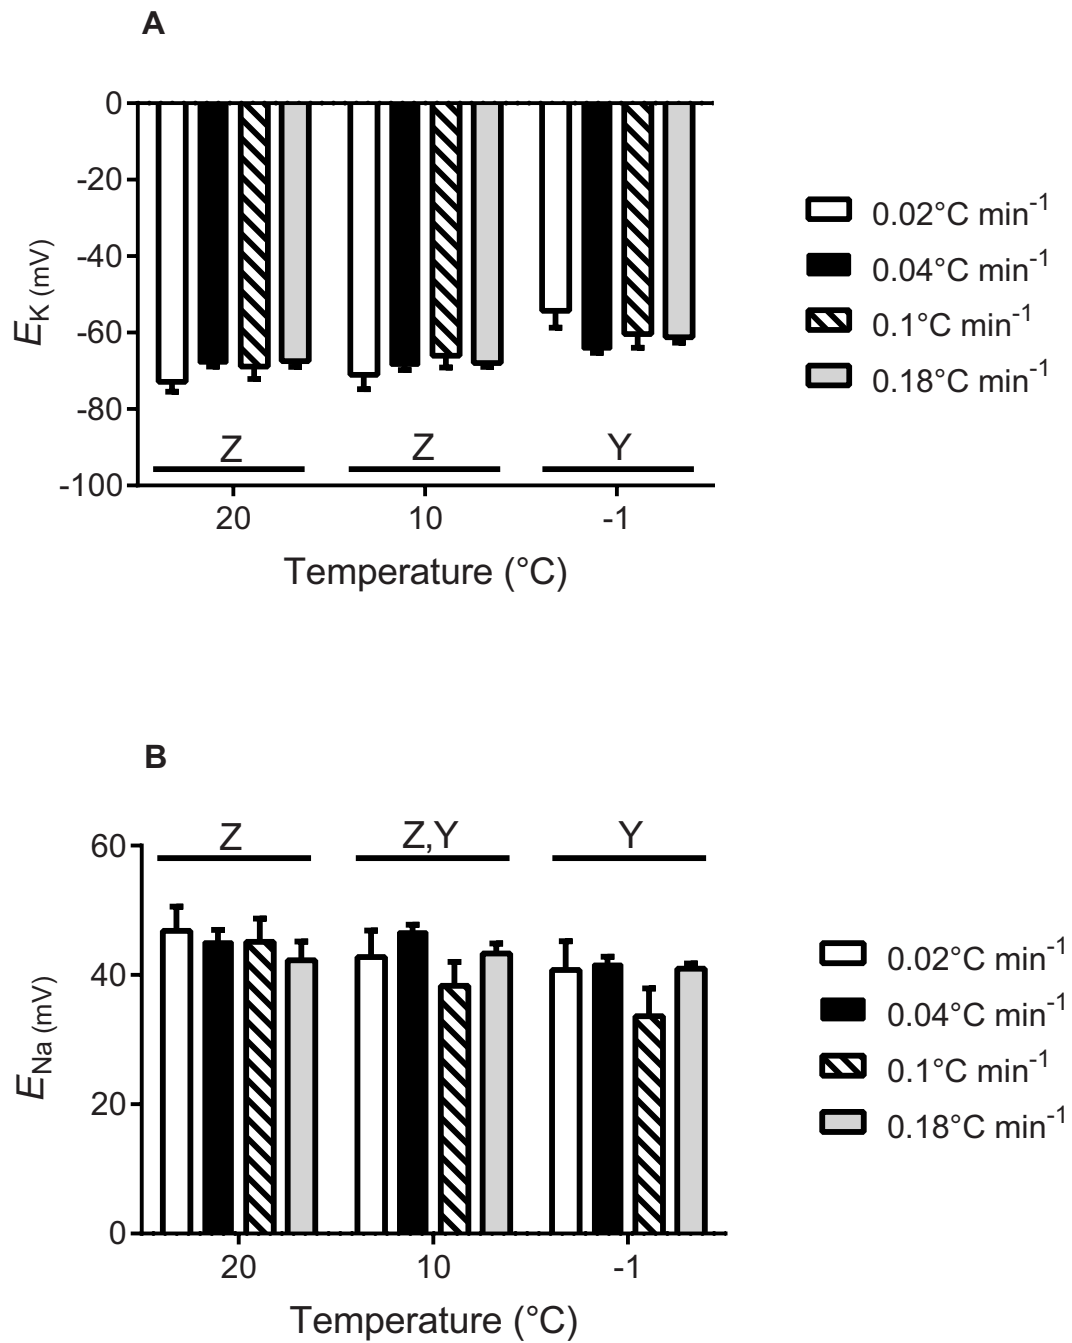

**Fig. S3. Nernst potential for  $\text{K}^+$  and  $\text{Na}^+$  at different temperatures and cooling rates.** (A) Nernst potential for  $\text{K}^+$  ( $E_K$ ) calculated from the intra- and extracellular  $[\text{K}^+]$  at three temperatures during different cooling rates. Bars represent means  $\pm$  s.e.m. of 8-10 samples in each treatment. A significant effect of temperature was found using a Two-way ANOVA. Dissimilar letter indicate groups that differ significantly ( $P < 0.05$ ). (B) Nernst potential for  $\text{Na}^+$  ( $E_{Na}$ ) calculated from the intra- and extracellular  $[\text{Na}^+]$  at three temperatures during different cooling rates. Bars represent means  $\pm$  s.e.m. of 8-10 samples in each treatment. A significant effect of temperature was found using a Two-way ANOVA. Dissimilar letter indicate groups that differ significantly ( $P < 0.05$ ).
